# Supplementary material for: Correlation between Lindane Use and the Incidence of Thyroid Cancer in the United States: An Ecological Study
Source: MDPI journal article supplement (doi:10.3390/ijerph192013158), 2022-10-13
Supplement: s1 [file s1]

| State       | Lindane use<br>kg/cropland |                  | Thyroid Cancer IR (2019) |      |        |
|-------------|----------------------------|------------------|--------------------------|------|--------|
|             | 1992                       | 2007             | Male and Female          | Male | Female |
| Alabama     | 0.51                       | 0.05             | 9.4                      | 4.6  | 13.8   |
| Alaska      | NA                         | NA               | 12.1                     | 6.8  | 17.9   |
| Arizona     | 0.005<br>(1996)            | 0.1 (2001)       | 11.7                     | 6.2  | 17.2   |
| Arkansas    | 0.007<br>(1993)            | 0.003            | 12.8                     | 6.7  | 18.7   |
| California  | 0.23                       | 0.002<br>(2005)  | 13.0                     | 6.9  | 19.0   |
| Colorado    | 0.0006                     | 0.02             | 12.7                     | 8.5  | 17.2   |
| Connecticut | 0.57<br>(1995)             | 0.06             | 16.7                     | 9.1  | 24.1   |
| Delaware    | 0.16<br>(1995)             | 0.8              | 14.2                     | 8.0  | 20.1   |
| Florida     | 0.12                       | 0.0003<br>(2005) | 12.5                     | 6.7  | 18.2   |
| Georgia     | 2.33                       | 0.07             | 11.2                     | 6.3  | 15.7   |
| Idaho       | 0.51                       | 0.06<br>(2004)   | 12.7                     | 7.1  | 18.4   |
| Illinois    | 0.007<br>(1993)            | 0.02             | 13.5                     | 7.0  | 19.8   |

|               |                 |                  |      |     |      |
|---------------|-----------------|------------------|------|-----|------|
| Indiana       | 0.015           | 0.02             | 10.5 | 5.9 | 15.0 |
| Iowa          | 0.03<br>(1993)  | 0.03             | 14.5 | 8.8 | 20.4 |
| Kansas        | 0.04            | 0.01             | 14.0 | 7.5 | 20.7 |
| Kentucky      | 0.04            | 0.02             | 14.0 | 6.7 | 21.2 |
| Louisiana     | 0.005<br>(1993) | 0.07<br>(2006)   | 14.1 | 7.3 | 20.7 |
| Maine         | NA              | NA               | 15.9 | 8.0 | 23.6 |
| Maryland      | 0.007           | 0.25             | 12.3 | 6.6 | 17.7 |
| Massachusetts | 0.34<br>(1995)  | 0.03             | 14.3 | 7.8 | 20.4 |
| Michigan      | 0.38            | 0.01             | 11.6 | 6.5 | 16.6 |
| Minnesota     | 0.02            | 0.01             | 10.6 | 6.3 | 15.0 |
| Mississippi   | 0.04            | 0.01             | 8.0  | 4.5 | 11.4 |
| Missouri      | 0.01<br>(1993)  | 0.03             | 11.6 | 6.2 | 16.6 |
| Montana       | 0.17<br>(1993)  | 0.0001<br>(2006) | 14.0 | 9.9 | 18.3 |
| Nebraska      | 0.02            | 0.04             | 14.7 | 8.4 | 21.2 |

|                |                |                  |      |      |      |
|----------------|----------------|------------------|------|------|------|
| Nevada         | 0.0007         | 0.0007<br>(2005) | NA   | NA   | NA   |
| New Hampshire  | 0.34<br>(1995) | 0.04             | 12.0 | 5.3  | 18.7 |
| New Jersey     | 0.61           | 0.008            | 17.2 | 9.3  | 25.0 |
| New Mexico     | 0.002          | 0.002            | 16.4 | 9.8  | 22.9 |
| New York       | 0.15           | 0.1              | 19.6 | 10.8 | 28.1 |
| North Carolina | 0.004          | 0.17             | 10.6 | 5.4  | 15.5 |
| North Dakota   | 0.1 (1993)     | 0.0024<br>(2006) | 19.6 | 10.1 | 30.1 |
| Ohio           | 0.05           | 0.03             | 14.8 | 7.3  | 22.1 |
| Oklahoma       | 0.01           | 0.0015           | 12.7 | 7.1  | 18.3 |
| Oregon         | 0.03           | 0.03<br>(2005)   | 11.7 | 5.5  | 17.8 |
| Pennsylvania   | 0.27           | 0.002            | 15.9 | 9.0  | 22.7 |
| Rhode Island   | 0,34<br>(1995) | 0.02             | 15.9 | 9.1  | 22.5 |
| South Carolina | 0.04           | 0.12             | 9.7  | 5.7  | 13.5 |
| South Dakota   | 0.02<br>(2004) | 0.005            | 16.2 | 9.2  | 23.7 |
| Tennessee      | 0.02           | 0.01             | 10.5 | 5.6  | 15.1 |

|               |                |                 |      |     |      |
|---------------|----------------|-----------------|------|-----|------|
|               |                |                 |      |     |      |
| Texas         | 0.04           | 0.004           | 11.9 | 6.4 | 17.4 |
| Utah          | 0.38           | 0.38            | 16.5 | 9.0 | 24.2 |
| Vermont       | 0.46<br>(1995) | 0.05            | 14.5 | 6.9 | 22.0 |
| Virginia      | 0.007          | 0.11            | 11.0 | 5.3 | 16.6 |
| Washington    | 0.0003         | 0.006           | 11.6 | 5.7 | 17.6 |
| West Virginia | 0.009          | 0.006           | 16.3 | 7.6 | 24.9 |
| Wisconsin     | 0.1            | 0.04            | 12.8 | 7.5 | 18.2 |
| Wyoming       | 0.03           | 0.012<br>(2006) | 14.8 | 8.1 | 22.0 |
